# Supplementary material for: Molecular Analysis of Two Endemic Squalius Species: Evidence for Intergeneric Introgression among Cyprinids and Conservation Issues
Source: MDPI journal article supplement (doi:10.3390/fishes9010004), 2023-12-20
Supplement: s1 [file s1]

**KRKA - I FIELD TRIP (APRIL. 2005) LOCATION 3. (Brgljunsko jezero)**

| fish no. | species      | total mass |  | total length | standard length |  |  |  |  |  |
|----------|--------------|------------|--|--------------|-----------------|--|--|--|--|--|
| 1.       | Ilirski klen | 1          |  | 6,5          | 5,5             |  |  |  |  |  |
| 2.       | Ilirski klen | 70         |  | 18,7         | 15,5            |  |  |  |  |  |
| 3.       | Ilirski klen | 32         |  | 15,5         | 13,0            |  |  |  |  |  |
| 4.       | Ilirski klen | <1         |  | 6            | 5,0             |  |  |  |  |  |

**KRKA - I FIELD TRIP (APRIL. 2005) LOCATION 4. (Manastir Krka)**

| fish no. | species      | total mass |  | total length | standard length |  |  |  |  |  |
|----------|--------------|------------|--|--------------|-----------------|--|--|--|--|--|
| 1.       | Ilirski klen | 116        |  | 21,2         | 17,5            |  |  |  |  |  |
| 2.       | Ilirski klen | 129        |  | 22,0         | 18,5            |  |  |  |  |  |
| 3.       | Ilirski klen | 57         |  | 18,0         | 14,5            |  |  |  |  |  |
| 4.       | Ilirski klen | 129        |  | 23,5         | 19,0            |  |  |  |  |  |
| 5.       | Ilirski klen | 57         |  | 17,5         | 14,5            |  |  |  |  |  |

**KRKA - I FIELD TRIP (APRIL. 2005) LOCATION 5. (Roški slap)**

| fish no. | species      | total mass |  | total length | standard length |  |  |  |  |  |
|----------|--------------|------------|--|--------------|-----------------|--|--|--|--|--|
| 1.       | Ilirski klen | 435        |  | 33,0         | 27,5            |  |  |  |  |  |
| 2.       | Ilirski klen | 123        |  | 23,5         | 19,5            |  |  |  |  |  |
| 3.       | Ilirski klen | 321        |  | 30,0         | 25,5            |  |  |  |  |  |
| 4.       | Ilirski klen | 74         |  | 20,0         | 15,5            |  |  |  |  |  |
| 5.       | Ilirski klen | 74         |  | 18,5         | 15,0            |  |  |  |  |  |

**KRKA - I FIELD TRIP (APRIL. 2005) LOCATION 7. (Visovačko jezero iznad Skradinskog Buka)**

| fish no. | species        | total mass |    | total length | standard length |  |  |  |  |  |
|----------|----------------|------------|----|--------------|-----------------|--|--|--|--|--|
| 1.       | Zrmanjski klen | 16         | 15 | 13,0         | 10,5            |  |  |  |  |  |
| 2.       | Zrmanjski klen | 14         | 12 | 13,0         | 10,5            |  |  |  |  |  |
| 3.       | Zrmanjski klen | 11         | 10 | 11,8         | 9,3             |  |  |  |  |  |
| 4.       | Zrmanjski klen | 10         | 8  | 11,5         | 9,2             |  |  |  |  |  |
| 5.       | Zrmanjski klen | 9          | 7  | 11,0         | 9,0             |  |  |  |  |  |

**KRKA - I FIELD TRIP (APRIL. 2005) LOCATION 8. (Skradinski Buk)**

| fish no. | species      | total mass |  | total length | standard length |  |  |  |  |  |
|----------|--------------|------------|--|--------------|-----------------|--|--|--|--|--|
| 1.       | Ilirski klen | 221        |  | 27,0         | 22,5            |  |  |  |  |  |
| 2.       | Ilirski klen | 293        |  | 30,0         | 25,5            |  |  |  |  |  |
| 3.       | Ilirski klen | 173        |  | 24,5         | 20,5            |  |  |  |  |  |
| 4.       | Ilirski klen | 106        |  | 21,8         | 18,0            |  |  |  |  |  |
| 5.       | Ilirski klen | 184        |  | 25,0         | 20,5            |  |  |  |  |  |

**KRKA - II FIELD TRIP (MAY. 2005) LOCATION 3. (Brgljunsko jezero)**

| fish no. | species       | total mass |  | total length | standard length |  |  |  |  |  |
|----------|---------------|------------|--|--------------|-----------------|--|--|--|--|--|
| 1.       | Illyrian chub | 147        |  | 23,1         | 19,0            |  |  |  |  |  |
| 2.       | Illyrian chub | 51         |  | 16,8         | 13,5            |  |  |  |  |  |
| 3.       | Illyrian chub | 23         |  | 13,0         | 10,7            |  |  |  |  |  |

|    |               |     |  |      |      |  |  |  |  |  |
|----|---------------|-----|--|------|------|--|--|--|--|--|
| 4. | Illyrian chub | 100 |  | 21,0 | 17,0 |  |  |  |  |  |
| 5. | Illyrian chub | 80  |  | 22,0 | 16,5 |  |  |  |  |  |
| 6. | Illyrian chub | 211 |  | 26,5 | 21,5 |  |  |  |  |  |
| 7. | Illyrian chub | 50  |  | 18,7 | 15,5 |  |  |  |  |  |

**KRKA - II FIELD TRIP (MAY. 2005) LOCATION 5. (Roški slap)**

| fish no. | species       | total mass |  | total length | standard length |  |  |  |  |  |
|----------|---------------|------------|--|--------------|-----------------|--|--|--|--|--|
| 1.       | Zrmanja chub  | 31         |  | 14,8         | 12,0            |  |  |  |  |  |
| 2.       | Zrmanja chub  | 30         |  | 15,5         | 12,5            |  |  |  |  |  |
| 3.       | Zrmanja chub  | 17         |  | 12,8         | 10,5            |  |  |  |  |  |
| 4.       | Illyrian chub | 576        |  | 47,2         | 40,0            |  |  |  |  |  |
| 5.       | Zrmanja chub  | 113        |  | 23,5         | 19,0            |  |  |  |  |  |

**KRKA - II FIELD TRIP (MAY. 2005) LOCATION 7. (Visovačko jezero iznad Skradinskog Buka)**

| fish no. | species       | total mass |  | total length | standard length |  |  |  |  |  |
|----------|---------------|------------|--|--------------|-----------------|--|--|--|--|--|
| 1.       | Illyrian chub | 564        |  | 35,5         | 29,5            |  |  |  |  |  |
| 2.       | Illyrian chub | 696        |  | 38,0         | 31,5            |  |  |  |  |  |

**KRKA - II FIELD TRIP (MAY. 2005) LOCATION 8. (Skradinski Buk)**

| fish no. | species       | total mass |  | total length | standard length |  |  |  |  |  |
|----------|---------------|------------|--|--------------|-----------------|--|--|--|--|--|
| 1.       | Illyrian chub | 335        |  | 30,0         | 24,5            |  |  |  |  |  |
| 2.       | Illyrian chub | 76         |  | 20,0         | 16,0            |  |  |  |  |  |

|    |               |    |  |      |      |  |  |  |  |  |
|----|---------------|----|--|------|------|--|--|--|--|--|
| 3. | Illyrian chub | 79 |  | 20,0 | 15,0 |  |  |  |  |  |
|----|---------------|----|--|------|------|--|--|--|--|--|

| KRKA - III FIELD TRIP (SEPTEMBER. 2005) LOCATION 3. (Brgljunsko jezero) |               |            |     |              |                 |  |  |  |  |  |
|-------------------------------------------------------------------------|---------------|------------|-----|--------------|-----------------|--|--|--|--|--|
| fish no.                                                                | species       | total mass |     | total length | standard length |  |  |  |  |  |
| 1.                                                                      | Illyrian chub | 76         | 65  | 20,0         | 16,5            |  |  |  |  |  |
| 2.                                                                      | Illyrian chub | 112        | 94  | 21,5         | 18,0            |  |  |  |  |  |
| 3.                                                                      | Illyrian chub | 99         | 84  | 21,0         | 19,0            |  |  |  |  |  |
| 4.                                                                      | Illyrian chub | 102        | 89  | 21,0         | 17,0            |  |  |  |  |  |
| 5.                                                                      | Illyrian chub | 82         | 70  | 19,0         | 16,0            |  |  |  |  |  |
| 6.                                                                      | Illyrian chub | 84         | 71  | 19,5         | 16,5            |  |  |  |  |  |
| 7.                                                                      | Illyrian chub | 4          | 3,5 | 8,0          | 6,5             |  |  |  |  |  |
| 8.                                                                      | Illyrian chub | 4          | 3   | 8,5          | 7,0             |  |  |  |  |  |
| 9.                                                                      | Illyrian chub | 10         | 9   | 10,0         | 8,5             |  |  |  |  |  |
| 10.                                                                     | Illyrian chub | 12         | 10  | 11,0         | 9,0             |  |  |  |  |  |
| 11.                                                                     | Illyrian chub | 32         | 28  | 15,0         | 12,5            |  |  |  |  |  |
| 12.                                                                     | Illyrian chub | 101        | 84  | 20,5         | 17,0            |  |  |  |  |  |
| 13.                                                                     | Illyrian chub | 104        | 87  | 21,0         | 17,5            |  |  |  |  |  |
| 14.                                                                     | Illyrian chub | 57         | 47  | 17,5         | 14,5            |  |  |  |  |  |
| 15.                                                                     | Illyrian chub | 50         | 44  | 17,0         | 14,0            |  |  |  |  |  |
| 16.                                                                     | Illyrian chub | 61         | 52  | 18,0         | 14,5            |  |  |  |  |  |
| 17.                                                                     | Illyrian chub | 73         | 63  | 18,5         | 15,5            |  |  |  |  |  |

|     |               |    |    |      |      |  |  |  |  |  |
|-----|---------------|----|----|------|------|--|--|--|--|--|
| 18. | Illyrian chub | 23 | 20 | 13,5 | 11,5 |  |  |  |  |  |
| 19. | Illyrian chub | 6  | 5  | 9,5  | 8,0  |  |  |  |  |  |
| 20. | Illyrian chub | 18 | 16 | 12,5 | 10,5 |  |  |  |  |  |
| 21. | Illyrian chub | 6  | 5  | 9,0  | 7,5  |  |  |  |  |  |

| KRKA - III FIELD TRIP (SEPTEMBER. 2005) LOCATION 5. (Roški slap) |               |            |  |              |                 |  |  |  |  |  |
|------------------------------------------------------------------|---------------|------------|--|--------------|-----------------|--|--|--|--|--|
| fish no.                                                         | species       | total mass |  | total length | standard length |  |  |  |  |  |
| 3.                                                               | Zrmanja chub  | 20         |  | 12,5         | 10,5            |  |  |  |  |  |
| 4.                                                               | Zrmanja chub  | 39         |  | 15,5         | 13,0            |  |  |  |  |  |
| 5.                                                               | Zrmanja chub  | 38         |  | 16,0         | 13,0            |  |  |  |  |  |
| 6.                                                               | Zrmanja chub  | 45         |  | 16,5         | 13,5            |  |  |  |  |  |
| 7.                                                               | Zrmanja chub  | 30         |  | 15,5         | 12,5            |  |  |  |  |  |
| 8.                                                               | Zrmanja chub  | 45         |  | 17,0         | 13,5            |  |  |  |  |  |
| 9.                                                               | Zrmanja chub  | 66         |  | 18,5         | 15,0            |  |  |  |  |  |
| 10.                                                              | Zrmanja chub  | 33         |  | 16,0         | 12,5            |  |  |  |  |  |
| 11.                                                              | Zrmanja chub  | 48         |  | 17,5         | 14,5            |  |  |  |  |  |
| 12.                                                              | Zrmanja chub  | 46         |  | 17,0         | 14,0            |  |  |  |  |  |
| 13.                                                              | Zrmanja chub  | 40         |  | 15,5         | 12,5            |  |  |  |  |  |
| 14.                                                              | Illyrian chub | 43         |  | 17,0         | 13,0            |  |  |  |  |  |
| 15.                                                              | Illyrian chub | 29         |  | 15,0         | 12,5            |  |  |  |  |  |
| 16.                                                              | Illyrian chub | 34         |  | 15,5         | 13,0            |  |  |  |  |  |

|     |              |    |  |      |      |  |  |  |  |  |
|-----|--------------|----|--|------|------|--|--|--|--|--|
| 17. | Zrmanja chub | 36 |  | 16,0 | 13,0 |  |  |  |  |  |
| 18. | Zrmanja chub | 38 |  | 15,5 | 12,5 |  |  |  |  |  |
| 19. | Zrmanja chub | 45 |  | 17,0 | 14,5 |  |  |  |  |  |
| 20. | Zrmanja chub | 23 |  | 13,5 | 11,0 |  |  |  |  |  |
| 21. | Zrmanja chub | 25 |  | 12,0 | 9,5  |  |  |  |  |  |

**KRKA - III FIELD TRIP (SEPTEMBER. 2005) LOCATION 7. (Visovačko jezero iznad Skradinskog Buka)**

| fish no. | species       | total mass |  | total length | standard length |  |  |  |  |  |
|----------|---------------|------------|--|--------------|-----------------|--|--|--|--|--|
| 1.       | Illyrian chub | 506        |  | 35,5         | 30,0            |  |  |  |  |  |
| 2.       | Illyrian chub | 369        |  | 32,5         | 27,0            |  |  |  |  |  |
| 3.       | Illyrian chub | 372        |  | 32,0         | 27,0            |  |  |  |  |  |
| 4.       | Illyrian chub | 296        |  | 31,0         | 25,0            |  |  |  |  |  |
| 5.       | Illyrian chub | 288        |  | 30,0         | 24,5            |  |  |  |  |  |
| 6.       | Illyrian chub | 478        |  | 35,0         | 29,0            |  |  |  |  |  |

**KRKA - III FIELD TRIP (SEPTEMBER. 2005) LOCATION 8. (Skradinski Buk)**

| fish no. | species      | total mass |  | total length | standard length |  |  |  |  |  |
|----------|--------------|------------|--|--------------|-----------------|--|--|--|--|--|
| 1.       | Zrmanja chub | 39         |  | 15,2         | 12,0            |  |  |  |  |  |
| 2.       | Zrmanja chub | 15         |  | 11,5         | 9,0             |  |  |  |  |  |
| 3.       | Zrmanja chub | 10         |  | 11,5         | 8,5             |  |  |  |  |  |
| 4.       | Zrmanja chub | 26         |  | 13,5         | 11,0            |  |  |  |  |  |
| 5.       | Zrmanja chub | 12         |  | 11,5         | 9,5             |  |  |  |  |  |

|     |              |    |  |      |     |  |  |  |  |  |
|-----|--------------|----|--|------|-----|--|--|--|--|--|
| 6.  | Zrmanja chub | 10 |  | 10,5 | 8,5 |  |  |  |  |  |
| 7.  | Zrmanja chub | 8  |  | 9,5  | 7,5 |  |  |  |  |  |
| 8.  | Zrmanja chub | 12 |  | 11,0 | 9,0 |  |  |  |  |  |
| 9.  | Zrmanja chub | 6  |  | 9,0  | 7,0 |  |  |  |  |  |
| 10. | Zrmanja chub | 6  |  | 9,0  | 7,0 |  |  |  |  |  |
| 11. | Zrmanja chub | 3  |  | 8,0  | 6,5 |  |  |  |  |  |
| 12. | Zrmanja chub | 6  |  | 9,5  | 8,0 |  |  |  |  |  |
| 13. | Zrmanja chub | 4  |  | 8,0  | 6,5 |  |  |  |  |  |
| 14. | Zrmanja chub | 3  |  | 8,5  | 6,5 |  |  |  |  |  |
| 15. | Zrmanja chub | 3  |  | 7,5  | 6,5 |  |  |  |  |  |
| 16. | Zrmanja chub | 6  |  | 8,5  | 7,0 |  |  |  |  |  |
| 17. | Zrmanja chub | 10 |  | 10,0 | 8,0 |  |  |  |  |  |
| 18. | Zrmanja chub | 11 |  | 11,0 | 9,0 |  |  |  |  |  |
| 19. | Zrmanja chub | 8  |  | 9,5  | 8,0 |  |  |  |  |  |
| 20. | Zrmanja chub | 8  |  | 9,0  | 7,5 |  |  |  |  |  |

**KRKA - IV FIELD TRIP (FEBRUARY. 2006) LOCATION 5. (Roški slap)**

| fish no. | species      | total mass |  | total length | standard length |  |  |  |  |  |
|----------|--------------|------------|--|--------------|-----------------|--|--|--|--|--|
| 1.       | Zrmanja chub | 31         |  | 14,5         | 12,0            |  |  |  |  |  |

**KRKA - IV FIELD TRIP (FEBRUARY. 2006) LOCATION 8. (Skradinski Buk)**

| fish no. | species | total mass |  | total length | standard length |  |  |  |  |  |
|----------|---------|------------|--|--------------|-----------------|--|--|--|--|--|
|----------|---------|------------|--|--------------|-----------------|--|--|--|--|--|

|     |              |      |  |      |      |  |  |  |  |  |
|-----|--------------|------|--|------|------|--|--|--|--|--|
| 2.  | Zrmanja chub | 66,1 |  | 19,5 | 16,0 |  |  |  |  |  |
| 3.  | Zrmanja chub | 51,6 |  | 17,0 | 13,5 |  |  |  |  |  |
| 4.  | Zrmanja chub | 69,4 |  | 19,5 | 16,0 |  |  |  |  |  |
| 6.  | Zrmanja chub | 44,4 |  | 16,0 | 13,0 |  |  |  |  |  |
| 7.  | Zrmanja chub | 60,8 |  | 18,5 | 15,0 |  |  |  |  |  |
| 8.  | Zrmanja chub | 62,4 |  | 18,5 | 15,0 |  |  |  |  |  |
| 9.  | Zrmanja chub | 53,6 |  | 18,0 | 15,0 |  |  |  |  |  |
| 10. | Zrmanja chub | 47,5 |  | 17,5 | 14,0 |  |  |  |  |  |
| 11. | Zrmanja chub | 53,6 |  | 18,0 | 15,0 |  |  |  |  |  |
| 12. | Zrmanja chub | 34,1 |  | 16,0 | 13,0 |  |  |  |  |  |
| 13. | Zrmanja chub | 16,3 |  | 12,5 | 10,0 |  |  |  |  |  |
| 14. | Zrmanja chub | 42,0 |  | 16,5 | 13,0 |  |  |  |  |  |
| 15. | Zrmanja chub | 32,1 |  | 15,5 | 12,5 |  |  |  |  |  |
| 17. | Zrmanja chub | 38,4 |  | 16,1 | 13,5 |  |  |  |  |  |
| 18. | Zrmanja chub | 29,3 |  | 15,0 | 12,5 |  |  |  |  |  |
| 20. | Zrmanja chub | 11,7 |  | 11,0 | 9,0  |  |  |  |  |  |
| 22. | Zrmanja chub | 22,0 |  | 13,5 | 11,0 |  |  |  |  |  |

**KRKA - V FIELD TRIP (JUNE. 2006) LOCATION 3. (Brgljunsko jezero)**

| fish no. | species      | total mass |  | total length | standard length |  |  |  |  |  |
|----------|--------------|------------|--|--------------|-----------------|--|--|--|--|--|
| 14.      | Zrmanja chub | 21,5       |  | 12,3         | 10,3            |  |  |  |  |  |



|     |              |      |  |      |      |  |  |  |  |  |
|-----|--------------|------|--|------|------|--|--|--|--|--|
| 15. | Zrmanja chub | 16,6 |  | 12,0 | 10,2 |  |  |  |  |  |
| 16. | Zrmanja chub | 19,6 |  | 12,0 | 10,0 |  |  |  |  |  |
| 17. | Zrmanja chub | 17,1 |  | 11,7 | 10,0 |  |  |  |  |  |
| 18. | Zrmanja chub | 23,0 |  | 13,0 | 11,0 |  |  |  |  |  |
| 19. | Zrmanja chub | 13,9 |  | 11,0 | 9,2  |  |  |  |  |  |
| 20. | Zrmanja chub | 1,5  |  | 6,2  | 5,0  |  |  |  |  |  |
| 21. | Zrmanja chub | 8,6  |  | 9,3  | 7,8  |  |  |  |  |  |
| 22. | Zrmanja chub | 19,9 |  | 12,2 | 10,0 |  |  |  |  |  |
| 23. | Zrmanja chub | 13,8 |  | 10,5 | 8,8  |  |  |  |  |  |
| 24. | Zrmanja chub | 9,7  |  | 9,2  | 7,5  |  |  |  |  |  |
| 25. | Zrmanja chub | 18,1 |  | 12,5 | 10,2 |  |  |  |  |  |
| 26. | Zrmanja chub | 11,6 |  | 10,5 | 8,5  |  |  |  |  |  |
| 27. | Zrmanja chub | 17,0 |  | 11,5 | 9,7  |  |  |  |  |  |
| 28. | Zrmanja chub | 17,5 |  | 11,5 | 9,5  |  |  |  |  |  |
| 29. | Zrmanja chub | 15,3 |  | 11,5 | 9,5  |  |  |  |  |  |
| 30. | Zrmanja chub | 15,0 |  | 11,3 | 9,5  |  |  |  |  |  |
| 31. | Zrmanja chub | 11,4 |  | 10,3 | 8,5  |  |  |  |  |  |
| 32. | Zrmanja chub | 4,1  |  | 7,2  | 6,0  |  |  |  |  |  |
| 33. | Zrmanja chub | 3,8  |  | 6,8  | 5,7  |  |  |  |  |  |
| 34. | Zrmanja chub | 8,3  |  | 9,2  | 7,5  |  |  |  |  |  |
| 35. | Zrmanja chub | 7,0  |  | 8,3  | 7,0  |  |  |  |  |  |

|     |              |      |  |      |     |  |  |  |  |  |
|-----|--------------|------|--|------|-----|--|--|--|--|--|
| 36. | Zrmanja chub | 4,2  |  | 7,0  | 6,0 |  |  |  |  |  |
| 37. | Zrmanja chub | 14,5 |  | 11,0 | 9,0 |  |  |  |  |  |

**KRKA – V FIELD TRIP (JUNE. 2006) LOCATION 4. (Manastir Krka)**

| fish no. | species       | total mass |  | total length | standard length |  |  |  |  |  |
|----------|---------------|------------|--|--------------|-----------------|--|--|--|--|--|
| 1.       | Illyrian chub | 131,3      |  | 24,0         | 20,5            |  |  |  |  |  |
| 2.       | Illyrian chub | 187,2      |  | 26,5         | 22,0            |  |  |  |  |  |
| 3.       | Illyrian chub | 64,4       |  | 19,5         | 15,5            |  |  |  |  |  |
| 4.       | Illyrian chub | 203,7      |  | 27,0         | 22,5            |  |  |  |  |  |
| 5.       | Illyrian chub | 133,5      |  | 22,5         | 19,0            |  |  |  |  |  |
| 6.       | Illyrian chub | 139,4      |  | 24,5         | 20,0            |  |  |  |  |  |
| 7.       | Illyrian chub | 149,0      |  | 25,5         | 21,0            |  |  |  |  |  |
| 8.       | Illyrian chub | 49,1       |  | 18,0         | 15,0            |  |  |  |  |  |
| 9.       | Illyrian chub | 143,1      |  | 25,0         | 21,0            |  |  |  |  |  |
| 10.      | Illyrian chub | 119,5      |  | 23,0         | 19,0            |  |  |  |  |  |

**KRKA - V FIELD TRIP (JUNE. 2006) LOCATION 5. (Roški slap)**

| fish no. | species       | total mass |  | total length | standard length |  |  |  |  |  |
|----------|---------------|------------|--|--------------|-----------------|--|--|--|--|--|
| 1.       | Illyrian chub | 72,0       |  | 19,2         | 16,0            |  |  |  |  |  |
| 2.       | Illyrian chub | 99,0       |  | 21,0         | 17,5            |  |  |  |  |  |
| 3.       | Illyrian chub | 44,0       |  | 17,0         | 14,5            |  |  |  |  |  |

|     |               |       |  |      |      |  |  |  |  |  |
|-----|---------------|-------|--|------|------|--|--|--|--|--|
| 4.  | Illyrian chub | 77,0  |  | 19,5 | 16,5 |  |  |  |  |  |
| 5.  | Illyrian chub | 83,0  |  | 20,0 | 16,5 |  |  |  |  |  |
| 6.  | Illyrian chub | 72,0  |  | 19,0 | 15,5 |  |  |  |  |  |
| 7.  | Illyrian chub | 118,0 |  | 22,0 | 18,5 |  |  |  |  |  |
| 8.  | Illyrian chub | 219,0 |  | 27,0 | 22,5 |  |  |  |  |  |
| 9.  | Illyrian chub | 109,0 |  | 22,0 | 18,5 |  |  |  |  |  |
| 10. | Illyrian chub | 89,0  |  | 21,5 | 18,0 |  |  |  |  |  |

**KRKA - V FIELD TRIP (JUNE. 2006) LOCATION 7. (Visovačko jezero iznad Skradinskog Buka)**

| fish no. | species       | total mass |  | total length | standard length |  |  |  |  |  |
|----------|---------------|------------|--|--------------|-----------------|--|--|--|--|--|
| 1.       | Illyrian chub | 27,7       |  | 15,5         | 13,             |  |  |  |  |  |
| 2.       | Illyrian chub | 114,5      |  | 23,0         | 19,0            |  |  |  |  |  |
| 3.       | Illyrian chub | 85,0       |  | 20,0         | 17,0            |  |  |  |  |  |
| 4.       | Illyrian chub | 54,0       |  | 18,0         | 15,0            |  |  |  |  |  |
| 5.       | Illyrian chub | 28,0       |  | 14,0         | 11,5            |  |  |  |  |  |
| 6.       | Illyrian chub | 56,8       |  | 18,5         | 15,7            |  |  |  |  |  |
| 7.       | Illyrian chub | 39,0       |  | 16,0         | 13,5            |  |  |  |  |  |
| 8.       | Illyrian chub | 179,0      |  | 25,5         | 21,0            |  |  |  |  |  |

**KRKA - V FIELD TRIP (JUNE. 2006) LOCATION 8. (Skradinski Buk)**

| fish no. | species       | total mass |  | total length | standard length |  |  |  |  |  |
|----------|---------------|------------|--|--------------|-----------------|--|--|--|--|--|
| 1.       | Illyrian chub | 131,2      |  | 24,5         | 20,5            |  |  |  |  |  |

|     |               |       |  |      |      |  |  |  |  |  |
|-----|---------------|-------|--|------|------|--|--|--|--|--|
| 2.  | Illyrian chub | 86,6  |  | 19,5 | 16,0 |  |  |  |  |  |
| 3.  | Illyrian chub | 38,2  |  | 15,2 | 12,8 |  |  |  |  |  |
| 4.  | Illyrian chub | 114,0 |  | 23,0 | 19,0 |  |  |  |  |  |
| 5.  | Illyrian chub | 40,0  |  | 15,5 | 13,0 |  |  |  |  |  |
| 6.  | Illyrian chub | 39,0  |  | 15,5 | 13,0 |  |  |  |  |  |
| 7.  | Illyrian chub | 24,7  |  | 13,5 | 11,0 |  |  |  |  |  |
| 8.  | Illyrian chub | 32,5  |  | 14,7 | 12,3 |  |  |  |  |  |
| 9.  | Illyrian chub | 24,3  |  | 13,5 | 11,0 |  |  |  |  |  |
| 10. | Illyrian chub | 35,0  |  | 15,5 | 13,0 |  |  |  |  |  |

**KRKA - VI FIELD TRIP (OCTOBER. 2006) LOCATION 4. (Manastir Krka)**

| fish no. | species       | total mass |  | total length | standard length |  |  |  |  |  |
|----------|---------------|------------|--|--------------|-----------------|--|--|--|--|--|
| 1.       | Illyrian chub | 18,2       |  | 12,6         | 10,7            |  |  |  |  |  |

**KRKA - VI FIELD TRIP (SEPTEMBER. 2006) LOCATION 5. (Roški slap)**

| fish no. | species       | total mass |  | total length | standard length |  |  |  |  |  |
|----------|---------------|------------|--|--------------|-----------------|--|--|--|--|--|
| 25.      | Zrmanja chub  | 53,0       |  | 17,0         | 14,4            |  |  |  |  |  |
| 26.      | Illyrian chub | 154,0      |  | 24,0         | 21,0            |  |  |  |  |  |
| 27.      | Illyrian chub | 79,0       |  | 19,8         | 17,0            |  |  |  |  |  |
| 30.      | Zrmanja chub  | 51,0       |  | 17,5         | 15,0            |  |  |  |  |  |
| 32.      | Illyrian chub | 46,0       |  | 16,0         | 13,0            |  |  |  |  |  |
| 33.      | Zrmanja chub  | 38,0       |  | 15,5         | 13,5            |  |  |  |  |  |

|     |               |      |  |      |      |  |  |  |  |  |
|-----|---------------|------|--|------|------|--|--|--|--|--|
| 34. | Zrmanja chub  | 28,0 |  | 14,2 | 12,0 |  |  |  |  |  |
| 36. | Zrmanja chub  | 25,0 |  | 13,5 | 11,7 |  |  |  |  |  |
| 38. | Zrmanja chub  | 62,0 |  | 18,0 | 15,1 |  |  |  |  |  |
| 39  | Illyrian chub | 38,0 |  | 15,0 | 13,2 |  |  |  |  |  |

**KRKA - VI FIELD TRIP (OCTOBER. 2006) LOCATION 7. (Visovačko jezero iznad Skradinskog Buka)**

| fish no. | species       | total mass |  | total length | standard length |  |  |  |  |  |
|----------|---------------|------------|--|--------------|-----------------|--|--|--|--|--|
| 1.       | Illyrian chub | 286,9      |  | 29,5         | 26,0            |  |  |  |  |  |
| 2.       | Illyrian chub | 168,1      |  | 24,8         | 21,0            |  |  |  |  |  |
| 3.       | Illyrian chub | 196,7      |  | 24,6         | 21,0            |  |  |  |  |  |
| 18.      | Illyrian chub | 152,9      |  | 24,2         | 20,7            |  |  |  |  |  |
| 20.      | Illyrian chub | 191,2      |  | 25,5         | 22,0            |  |  |  |  |  |

**KRKA - VI FIELD TRIP (OCTOBER. 2006) LOCATION 8. (Skradinski Buk)**

| fish no. | species      | total mass |  | total length | standard length |  |  |  |  |  |
|----------|--------------|------------|--|--------------|-----------------|--|--|--|--|--|
| 1.       | Zrmanja chub | 39,7       |  | 15,3         | 13,0            |  |  |  |  |  |
| 2.       | Zrmanja chub | 30,0       |  | 15,0         | 12,4            |  |  |  |  |  |
| 3.       | Zrmanja chub | 23,2       |  | 13,0         | 10,5            |  |  |  |  |  |
| 4.       | Zrmanja chub | 38,1       |  | 15,5         | 12,8            |  |  |  |  |  |
| 5.       | Zrmanja chub | 30,2       |  | 14,7         | 12,3            |  |  |  |  |  |
| 11.      | Zrmanja chub | 14,0       |  | 11,1         | 9,3             |  |  |  |  |  |
| 12.      | Zrmanja chub | 30,5       |  | 14,7         | 12,4            |  |  |  |  |  |

|     |              |      |  |      |      |  |  |  |  |  |
|-----|--------------|------|--|------|------|--|--|--|--|--|
| 13. | Zrmanja chub | 42,8 |  | 16,2 | 13,9 |  |  |  |  |  |
| 14. | Zrmanja chub | 23,4 |  | 13,4 | 11,2 |  |  |  |  |  |
| 15. | Zrmanja chub | 17,2 |  | 12,5 | 10,3 |  |  |  |  |  |
| 17. | Zrmanja chub | 29,9 |  | 14,2 | 12,0 |  |  |  |  |  |
| 18. | Zrmanja chub | 28,2 |  | 14,1 | 22,0 |  |  |  |  |  |
| 19. | Zrmanja chub | 26,1 |  | 13,5 | 11,3 |  |  |  |  |  |
| 20. | Zrmanja chub | 17,0 |  | 12,0 | 10,1 |  |  |  |  |  |

**KRKA - VII FIELD TRIP (DECEMBER. 2006) LOCATION 3. (Brgljunsko jezero)**

| fish no. | species      | total mass |  | total length | standard length |  |  |  |  |  |
|----------|--------------|------------|--|--------------|-----------------|--|--|--|--|--|
| 7.       | Zrmanja chub | 27,1       |  | 13,5         | 11,8            |  |  |  |  |  |
| 8.       | Zrmanja chub | 35,4       |  | 15,0         | 12,5            |  |  |  |  |  |
| 9.       | Zrmanja chub | 29,1       |  | 14,2         | 11,0            |  |  |  |  |  |
| 10.      | Zrmanja chub | 34,3       |  | 15,0         | 12,9            |  |  |  |  |  |
| 21.      | Zrmanja chub | 14,5       |  | 11,3         | 9,8             |  |  |  |  |  |
| 25.      | Zrmanja chub | 17,5       |  | 12,0         | 10,1            |  |  |  |  |  |
| 26.      | Zrmanja chub | 17,7       |  | 12,1         | 10,3            |  |  |  |  |  |
| 27.      | Zrmanja chub | 20,5       |  | 12,7         | 10,5            |  |  |  |  |  |
| 28.      | Zrmanja chub | 9,8        |  | 9,9          | 8,0             |  |  |  |  |  |
| 29.      | Zrmanja chub | 18,1       |  | 12,1         | 10,0            |  |  |  |  |  |
| 34.      | Zrmanja chub | 9,3        |  | 9,2          | 7,7             |  |  |  |  |  |

**KRKA - VII FIELD TRIP (DECEMBER. 2006) LOCATION 5. (Roški slap)**

| fish no. | species      | total mass |  | total length | standard length |  |  |  |  |  |
|----------|--------------|------------|--|--------------|-----------------|--|--|--|--|--|
| 4.       | Zrmanja chub | 43,8       |  | 16,8         | 14,0            |  |  |  |  |  |
| 5.       | Zrmanja chub | 17,6       |  | 12,5         | 10,5            |  |  |  |  |  |
| 6.       | Zrmanja chub | 24,3       |  | 13,5         | 11,5            |  |  |  |  |  |
| 7.       | Zrmanja chub | 9,9        |  | 10,2         | 8,5             |  |  |  |  |  |
| 8.       | Zrmanja chub | 12,4       |  | 11,3         | 9,6             |  |  |  |  |  |
| 9.       | Zrmanja chub | 3,4        |  | 7,0          | 5,5             |  |  |  |  |  |
| 10.      | Zrmanja chub | 0,8        |  | 5,0          | 4,0             |  |  |  |  |  |
| 11.      | Zrmanja chub | 3,2        |  | 7,1          | 5,9             |  |  |  |  |  |
| 12.      | Zrmanja chub | 1,0        |  | 4,5          | 3,8             |  |  |  |  |  |
| 13.      | Zrmanja chub | 4,5        |  | 8,0          | 6,8             |  |  |  |  |  |

**KRKA - VII FIELD TRIP (DECEMBER. 2006) LOCATION 7. (Visovačko jezero iznad Skradinskog Buka)**

| fish no. | species      | total mass |  | total length | standard length |  |  |  |  |  |
|----------|--------------|------------|--|--------------|-----------------|--|--|--|--|--|
| 1.       | Zrmanja chub | 1,6        |  | 5,2          | 4,8             |  |  |  |  |  |
| 2.       | Zrmanja chub | 1,4        |  | 5,4          | 4,8             |  |  |  |  |  |
| 3.       | Zrmanja chub | 1,8        |  | 6,0          | 5,0             |  |  |  |  |  |
| 4.       | Zrmanja chub | 1,0        |  | 5,4          | 4,7             |  |  |  |  |  |
| 6.       | Zrmanja chub | 1,7        |  | 5,2          | 4,5             |  |  |  |  |  |
| 7.       | Zrmanja chub | 2,7        |  | 6,5          | 5,5             |  |  |  |  |  |

|     |              |     |  |     |     |  |  |  |  |  |
|-----|--------------|-----|--|-----|-----|--|--|--|--|--|
| 8.  | Zrmanja chub | 2,0 |  | 6,0 | 4,5 |  |  |  |  |  |
| 9.  | Zrmanja chub | 2,4 |  | 6,8 | 5,5 |  |  |  |  |  |
| 14. | Zrmanja chub | 2,6 |  | 7,0 | 5,5 |  |  |  |  |  |
| 15. | Zrmanja chub | 1,9 |  | 6,0 | 5,0 |  |  |  |  |  |
| 16. | Zrmanja chub | 2,9 |  | 6,0 | 5,0 |  |  |  |  |  |
| 17. | Zrmanja chub | 2,5 |  | 6,8 | 5,5 |  |  |  |  |  |
| 19. | Zrmanja chub | 2,5 |  | 6,4 | 5,5 |  |  |  |  |  |
| 20. | Zrmanja chub | 1,5 |  | 5,5 | 4,5 |  |  |  |  |  |
| 21. | Zrmanja chub | 1,5 |  | 5,8 | 4,6 |  |  |  |  |  |
| 23. | Zrmanja chub | 2,1 |  | 6,1 | 5,2 |  |  |  |  |  |
| 24. | Zrmanja chub | 2,8 |  | 6,9 | 5,5 |  |  |  |  |  |

| KRKA - VII FIELD TRIP (DECEMBER. 2006) LOCATION 8. (Skradinski Buk) |              |            |  |              |                 |  |  |  |  |  |
|---------------------------------------------------------------------|--------------|------------|--|--------------|-----------------|--|--|--|--|--|
| fish no.                                                            | species      | total mass |  | total length | standard length |  |  |  |  |  |
| 1.                                                                  | Zrmanja chub | 26,7       |  | 14,6         | 12,0            |  |  |  |  |  |
| 2.                                                                  | Zrmanja chub | 36,2       |  | 17,0         | 13,9            |  |  |  |  |  |
| 3.                                                                  | Zrmanja chub | 54,7       |  | 17,1         | 14,5            |  |  |  |  |  |
| 4.                                                                  | Zrmanja chub | 41,7       |  | 17,0         | 14,3            |  |  |  |  |  |
| 5.                                                                  | Zrmanja chub | 47,7       |  | 16,9         | 14,2            |  |  |  |  |  |
| 6.                                                                  | Zrmanja chub | 29,0       |  | 15,4         | 12,9            |  |  |  |  |  |
| 13.                                                                 | Zrmanja chub | 24,3       |  | 14,0         | 11,9            |  |  |  |  |  |



|     |              |      |  |      |      |  |  |  |  |  |
|-----|--------------|------|--|------|------|--|--|--|--|--|
| 14. | Zrmanja chub | 23,1 |  | 14,1 | 11,5 |  |  |  |  |  |
| 15. | Zrmanja chub | 17,3 |  | 12,0 | 10,2 |  |  |  |  |  |
| 16. | Zrmanja chub | 17,2 |  | 12,1 | 10,1 |  |  |  |  |  |
| 17. | Zrmanja chub | 11,0 |  | 11,0 | 9,1  |  |  |  |  |  |
| 18. | Zrmanja chub | 9,7  |  | 12,5 | 8,7  |  |  |  |  |  |
| 19. | Zrmanja chub | 6,5  |  | 13,5 | 11,1 |  |  |  |  |  |
| 20. | Zrmanja chub | 21,2 |  | 14,0 | 12,0 |  |  |  |  |  |
| 21. | Zrmanja chub | 26,1 |  | 14,0 | 12,0 |  |  |  |  |  |
| 22. | Zrmanja chub | 14,7 |  | 12,3 | 10,5 |  |  |  |  |  |
| 23. | Zrmanja chub | 17,5 |  | 12,5 | 10,2 |  |  |  |  |  |
| 25. | Zrmanja chub | 20,4 |  | 12,9 | 10,8 |  |  |  |  |  |
| 27. | Zrmanja chub | 10,3 |  | 10,5 | 9,0  |  |  |  |  |  |
| 28. | Zrmanja chub | 14,1 |  | 11,5 | 9,5  |  |  |  |  |  |
| 29. | Zrmanja chub | 1,8  |  | 6,0  | 4,8  |  |  |  |  |  |
| 30. | Zrmanja chub | 28,8 |  | 15,1 | 13,0 |  |  |  |  |  |
| 31. | Zrmanja chub | 9,0  |  | 10,1 | 8,5  |  |  |  |  |  |
| 32. | Zrmanja chub | 13,8 |  | 12,0 | 10,0 |  |  |  |  |  |
| 33. | Zrmanja chub | 6,6  |  | 9,8  | 7,9  |  |  |  |  |  |
| 34. | Zrmanja chub | 9,8  |  | 10,3 | 8,5  |  |  |  |  |  |
| 35. | Zrmanja chub | 21,2 |  | 13,4 | 11,1 |  |  |  |  |  |
| 36. | Zrmanja chub | 17,0 |  | 13,0 | 10,5 |  |  |  |  |  |

|     |              |      |  |      |      |  |  |  |  |  |
|-----|--------------|------|--|------|------|--|--|--|--|--|
| 37. | Zrmanja chub | 14,8 |  | 12,1 | 10,0 |  |  |  |  |  |
| 38. | Zrmanja chub | 14,4 |  | 11,5 | 9,6  |  |  |  |  |  |
| 39. | Zrmanja chub | 12,6 |  | 11,2 | 9,3  |  |  |  |  |  |
| 40. | Zrmanja chub | 9,8  |  | 10,5 | 8,7  |  |  |  |  |  |

| KRKA – VIII FIELD TRIP (APRIL. 2007) LOCATION 4. (Manastir Krka) |              |            |  |              |                 |  |  |  |  |  |
|------------------------------------------------------------------|--------------|------------|--|--------------|-----------------|--|--|--|--|--|
| fish no.                                                         | species      | total mass |  | total length | standard length |  |  |  |  |  |
| 1.                                                               | Zrmanja chub | 204,4      |  | 28,0         | 23,5            |  |  |  |  |  |
| 2.                                                               | Zrmanja chub | 177,6      |  | 26,5         | 22,0            |  |  |  |  |  |
| 3.                                                               | Zrmanja chub | 152,9      |  | 24,5         | 20,5            |  |  |  |  |  |
| 4.                                                               | Zrmanja chub | 126,5      |  | 23,2         | 20,0            |  |  |  |  |  |
| 5.                                                               | Zrmanja chub | 87,9       |  | 21,0         | 17,0            |  |  |  |  |  |
| 6.                                                               | Zrmanja chub | 32,3       |  | 15,0         | 12,0            |  |  |  |  |  |
| 7.                                                               | Zrmanja chub | 25,6       |  | 14,5         | 11,5            |  |  |  |  |  |
| 8.                                                               | Zrmanja chub | 191,3      |  | 27,5         | 23,0            |  |  |  |  |  |
| 9.                                                               | Zrmanja chub | 69,3       |  | 19,5         | 16,0            |  |  |  |  |  |
| 10.                                                              | Zrmanja chub | 127,7      |  | 23,5         | 20,0            |  |  |  |  |  |
| 11.                                                              | Zrmanja chub | 63,5       |  | 19,0         | 15,5            |  |  |  |  |  |
| 12.                                                              | Zrmanja chub | 119,0      |  | 23,5         | 19,5            |  |  |  |  |  |
| 13.                                                              | Zrmanja chub | 47,8       |  | 17,0         | 14,5            |  |  |  |  |  |
| 14.                                                              | Zrmanja chub | 142,5      |  | 25,0         | 20,5            |  |  |  |  |  |

|     |              |      |  |      |      |  |  |  |  |
|-----|--------------|------|--|------|------|--|--|--|--|
| 15. | Zrmanja chub | 66,1 |  | 19,5 | 16,0 |  |  |  |  |
| 16. | Zrmanja chub | 54,2 |  | 17,5 | 14,0 |  |  |  |  |
| 17. | Zrmanja chub | 79,6 |  | 20,5 | 17,0 |  |  |  |  |
| 18. | Zrmanja chub | 56,2 |  | 18,5 | 15,0 |  |  |  |  |

**KRKA - VIII FIELD TRIP (APRIL. 2007) LOCATION 5. (Roški slap)**

| fish no. | species       | total mass |  | total length | standard length |  |  |  |  |
|----------|---------------|------------|--|--------------|-----------------|--|--|--|--|
| 5.       | Illyrian chub | 191,4      |  | 25,0         | 21,0            |  |  |  |  |
| 6.       | Illyrian chub | 70,9       |  | 19,5         | 16,0            |  |  |  |  |
| 7.       | Illyrian chub | 26,9       |  | 15,0         | 12,5            |  |  |  |  |
| 8.       | Illyrian chub | 152,5      |  | 25,0         | 21,0            |  |  |  |  |
| 9.       | Illyrian chub | 74,9       |  | 20,0         | 16,5            |  |  |  |  |
| 10.      | Illyrian chub | 136,5      |  | 24,5         | 20,0            |  |  |  |  |
| 11.      | Illyrian chub | 70,7       |  | 20,0         | 16,5            |  |  |  |  |
| 12.      | Illyrian chub | 59,6       |  | 19,0         | 15,5            |  |  |  |  |
| 13.      | Illyrian chub | 34,9       |  | 16,0         | 13,0            |  |  |  |  |
| 14.      | Illyrian chub | 41,7       |  | 17,2         | 14,0            |  |  |  |  |
| 15.      | Illyrian chub | 27,6       |  | 15,5         | 12,5            |  |  |  |  |
| 16.      | Illyrian chub | 12,7       |  | 11,5         | 9,5             |  |  |  |  |
| 17.      | Illyrian chub | 19,8       |  | 12,8         | 10,5            |  |  |  |  |

**KRKA - VIII FIELD TRIP (APRIL. 2007) LOCATION 7. (Visovačko jezero iznad Skradinskog Buka)**

| fish no. | vrsta         | Masa total |  | Dužina totalna | Dužina fork/SL |  |  |  |  |  |
|----------|---------------|------------|--|----------------|----------------|--|--|--|--|--|
| 1.       | Illyrian chub | 360,9      |  | 33,0           | 27,0           |  |  |  |  |  |
| 2.       | Illyrian chub | 225,1      |  | 27,5           | 23,0           |  |  |  |  |  |
| 3.       | Illyrian chub | 217,7      |  | 28,0           | 23,5           |  |  |  |  |  |
| 4.       | Illyrian chub | 142,3      |  | 23,5           | 20,0           |  |  |  |  |  |
| 5.       | Illyrian chub | 110,5      |  | 22,5           | 19,0           |  |  |  |  |  |
| 6.       | Illyrian chub | 68,4       |  | 19,5           | 16,0           |  |  |  |  |  |
| 7.       | Illyrian chub | 30,3       |  | 15,5           | 13,0           |  |  |  |  |  |

**KRKA - VIII FIELD TRIP (APRIL. 2007) LOCATION 8. (Skradinski Buk)**

| fish no. | species      | total mass |  | total length | standard length |  |  |  |  |  |
|----------|--------------|------------|--|--------------|-----------------|--|--|--|--|--|
| 1.       | Zrmanja chub | 38,7       |  | 16,0         | 13,0            |  |  |  |  |  |
| 2.       | Zrmanja chub | 44,1       |  | 16,5         | 14,0            |  |  |  |  |  |
| 3.       | Zrmanja chub | 46,2       |  | 17,5         | 14,0            |  |  |  |  |  |
| 4.       | Zrmanja chub | 33,3       |  | 15,5         | 13,0            |  |  |  |  |  |
| 5.       | Zrmanja chub | 22,6       |  | 13,5         | 11,0            |  |  |  |  |  |
| 6.       | Zrmanja chub | 23,7       |  | 13,5         | 11,0            |  |  |  |  |  |
| 7.       | Zrmanja chub | 17,4       |  | 13,0         | 10,0            |  |  |  |  |  |
| 8.       | Zrmanja chub | 19,4       |  | 13,5         | 10,5            |  |  |  |  |  |
| 11.      | Zrmanja chub | 64,9       |  | 18,0         | 15,0            |  |  |  |  |  |

**KRKA - IX FIELD TRIP (JULY. 2007) LOCATION 3. (Brgljunsko jezero)**

| fish no. | species      | total mass |  | total length | standard length |  |  |  |  |  |
|----------|--------------|------------|--|--------------|-----------------|--|--|--|--|--|
| 6.       | Zrmanja chub | 83,1       |  | 19,0         | 16,0            |  |  |  |  |  |
| 7.       | Zrmanja chub | 73,9       |  | 20,0         | 17,0            |  |  |  |  |  |
| 8.       | Zrmanja chub | 50,5       |  | 22,0         | 19,5            |  |  |  |  |  |
| 9.       | Zrmanja chub | 57,2       |  | 17,5         | 14,5            |  |  |  |  |  |
| 10.      | Zrmanja chub | 85,0       |  | 21,0         | 17,5            |  |  |  |  |  |
| 11.      | Zrmanja chub | 64,1       |  | 18,5         | 15,5            |  |  |  |  |  |
| 12.      | Zrmanja chub | 45,5       |  | 17,5         | 14,5            |  |  |  |  |  |
| 13.      | Zrmanja chub | 41,1       |  | 15,5         | 13,5            |  |  |  |  |  |
| 14.      | Zrmanja chub | 47,8       |  | 16,5         | 14,0            |  |  |  |  |  |
| 15.      | Zrmanja chub | 22,3       |  | 13,0         | 11,0            |  |  |  |  |  |

**KRKA – IX FIELD TRIP (JULY. 2007) LOCATION 4. (Manastir Krka)**

| fish no. | species       | total mass |  | total length | standard length |  |  |  |  |  |
|----------|---------------|------------|--|--------------|-----------------|--|--|--|--|--|
| 1.       | Zrmanja chub  | 72,2       |  | 20,5         | 17,0            |  |  |  |  |  |
| 2.       | Zrmanja chub  | 82,3       |  | 20,5         | 17,0            |  |  |  |  |  |
| 3.       | Illyrian chub | 89,2       |  | 21,5         | 17,0            |  |  |  |  |  |
| 4.       | Zrmanja chub  | 65,7       |  | 19,5         | 16,0            |  |  |  |  |  |
| 5.       | Illyrian chub | 31,2       |  | 15,0         | 12,0            |  |  |  |  |  |
| 6.       | Illyrian chub | 15,6       |  | 12,0         | 10,0            |  |  |  |  |  |
| 7.       | Zrmanja chub  | 112,7      |  | 23,0         | 19,0            |  |  |  |  |  |

|     |               |       |  |       |      |  |  |  |  |  |
|-----|---------------|-------|--|-------|------|--|--|--|--|--|
| 8.  | Zrmanja chub  | 137,9 |  | 24,5  | 20,5 |  |  |  |  |  |
| 9.  | Illyrian chub | 71,1  |  | 19,5  | 16,0 |  |  |  |  |  |
| 10. | Zrmanja chub  | 72,5  |  | 20,5  | 17,0 |  |  |  |  |  |
| 11. | Zrmanja chub  | 71,0  |  | 20,0  | 16,5 |  |  |  |  |  |
| 12. | Illyrian chub | 46,8  |  | 17,5  | 15,0 |  |  |  |  |  |
| 13. | Illyrian chub | 19,0  |  | 13,0, | 11,0 |  |  |  |  |  |
| 14. | Illyrian chub | 27,8  |  | 14,5  | 12,0 |  |  |  |  |  |
| 15. | Zrmanja chub  | 27,7  |  | 15,0  | 12,0 |  |  |  |  |  |
| 16. | Illyrian chub | 15,2  |  | 12,0  | 10,0 |  |  |  |  |  |
| 17. | Illyrian chub | 26,9  |  | 14,0  | 12,0 |  |  |  |  |  |
| 18. | Illyrian chub | 3,2   |  | 7,5   | 6,0  |  |  |  |  |  |

| KRKA - IX FIELD TRIP (JULY. 2007) LOCATION 5. (Roški slap) |               |            |  |              |                 |   |  |  |  |  |
|------------------------------------------------------------|---------------|------------|--|--------------|-----------------|---|--|--|--|--|
| fish no.                                                   | species       | total mass |  | total length | standard length |   |  |  |  |  |
| 16.                                                        | Illyrian chub | 113,1      |  | 22,0         | 18,0            |   |  |  |  |  |
| 17.                                                        | Illyrian chub | 107,0      |  | 21,0         | 18,5            |   |  |  |  |  |
| 18.                                                        | Illyrian chub | 114,3      |  | 23,5         | 19,5            |   |  |  |  |  |
| 19.                                                        | Illyrian chub | 77,1       |  | 19,5         | 16,5            |   |  |  |  |  |
| 20.                                                        | Illyrian chub | 116,0      |  | 23,5         | 20,0            |   |  |  |  |  |
| 21.                                                        | Illyrian chub | 70,5       |  | 19,0         | 15,5            | M |  |  |  |  |
| 22.                                                        | Illyrian chub | 153,4      |  | 24,5         | 20,5            |   |  |  |  |  |

|     |               |       |  |      |      |  |  |  |  |  |
|-----|---------------|-------|--|------|------|--|--|--|--|--|
| 23. | Illyrian chub | 198,2 |  | 26,0 | 21,5 |  |  |  |  |  |
| 24. | Illyrian chub | 118,6 |  | 22,5 | 19,0 |  |  |  |  |  |
| 25. | Illyrian chub | 113,5 |  | 22,5 | 18,5 |  |  |  |  |  |
| 26. | Illyrian chub | 171,2 |  | 24,5 | 21,0 |  |  |  |  |  |
| 27. | Illyrian chub | 49,3  |  | 17,0 | 14,0 |  |  |  |  |  |
| 28. | Illyrian chub | 62,2  |  | 18,0 | 15,5 |  |  |  |  |  |
| 29. | Illyrian chub | 52,2  |  | 15,0 | 12,0 |  |  |  |  |  |
| 30. | Illyrian chub | 82,0  |  | 19,5 | 16,5 |  |  |  |  |  |
| 31. | Illyrian chub | 121,1 |  | 22,5 | 19,0 |  |  |  |  |  |
| 32. | Illyrian chub | 159,1 |  | 26,0 | 21,5 |  |  |  |  |  |
| 33. | Illyrian chub | 121,7 |  | 23,5 | 19,5 |  |  |  |  |  |
| 34. | Illyrian chub | 109,9 |  | 22,0 | 19,0 |  |  |  |  |  |
| 35. | Illyrian chub | 118,9 |  | 23,0 | 19,0 |  |  |  |  |  |
| 36. | Illyrian chub | 83,4  |  | 20,0 | 16,5 |  |  |  |  |  |
| 37. | Illyrian chub | 106,7 |  | 22,0 | 18,0 |  |  |  |  |  |
| 38. | Illyrian chub | 32,4  |  | 14,5 | 12,0 |  |  |  |  |  |
| 39. | Illyrian chub | 34,6  |  | 15,0 | 13,0 |  |  |  |  |  |

| KRKA - IX FIELD TRIP (JULY. 2007) LOCATION 7. (Visovačko jezero iznad Skradinskog Buka) |              |            |  |              |                 |  |  |  |  |  |
|-----------------------------------------------------------------------------------------|--------------|------------|--|--------------|-----------------|--|--|--|--|--|
| fish no.                                                                                | species      | total mass |  | total length | standard length |  |  |  |  |  |
| 1.                                                                                      | Zrmanja chub | 103,7      |  | 22,0         | 18,5            |  |  |  |  |  |

|     |              |      |  |      |      |  |  |  |  |  |
|-----|--------------|------|--|------|------|--|--|--|--|--|
| 2.  | Zrmanja chub | 57,0 |  | 14,5 | 11,5 |  |  |  |  |  |
| 3.  | Zrmanja chub | 48,0 |  | 18,5 | 15,5 |  |  |  |  |  |
| 4.  | Zrmanja chub | 39,0 |  | 17,0 | 14,0 |  |  |  |  |  |
| 5.  | Zrmanja chub | 48,0 |  | 17,0 | 15,0 |  |  |  |  |  |
| 6.  | Zrmanja chub | 91,0 |  | 22,0 | 18,5 |  |  |  |  |  |
| 7.  | Zrmanja chub | 48,0 |  | 17,5 | 15,0 |  |  |  |  |  |
| 8.  | Zrmanja chub | 49,0 |  | 17,5 | 14,5 |  |  |  |  |  |
| 9.  | Zrmanja chub | 60,0 |  | 18,5 | 15,0 |  |  |  |  |  |
| 10. | Zrmanja chub | 47,0 |  | 18,0 | 15,0 |  |  |  |  |  |
| 11. | Zrmanja chub | 42,0 |  | 17,0 | 14,5 |  |  |  |  |  |
| 12. | Zrmanja chub | 30,0 |  | 15,0 | 13,0 |  |  |  |  |  |
| 13. | Zrmanja chub | 58,0 |  | 18,5 | 15,0 |  |  |  |  |  |
| 14. | Zrmanja chub | 63,0 |  | 19,0 | 16,0 |  |  |  |  |  |
| 15. | Zrmanja chub | 53,0 |  | 18,5 | 15,5 |  |  |  |  |  |
| 16. | Zrmanja chub | 51,0 |  | 17,5 | 15,0 |  |  |  |  |  |
| 17. | Zrmanja chub | 48,0 |  | 17,0 | 15,0 |  |  |  |  |  |
| 18. | Zrmanja chub | 63,0 |  | 19,0 | 16,0 |  |  |  |  |  |
| 19. | Zrmanja chub | 41,0 |  | 17,0 | 14,5 |  |  |  |  |  |
| 20. | Zrmanja chub | 49,0 |  | 18,0 | 15,0 |  |  |  |  |  |
| 21. | Zrmanja chub | 64,0 |  | 19,5 | 16,0 |  |  |  |  |  |
| 22. | Zrmanja chub | 35,0 |  | 16,0 | 13,0 |  |  |  |  |  |



|     |              |      |  |      |      |  |  |  |  |  |
|-----|--------------|------|--|------|------|--|--|--|--|--|
| 23. | Zrmanja chub | 58,0 |  | 19,0 | 16,0 |  |  |  |  |  |
| 24. | Zrmanja chub | 42,0 |  | 17,0 | 14,0 |  |  |  |  |  |

**KRKA - IX FIELD TRIP (JULY. 2007) LOCATION 8. (Skradinski Buk)**

| fish no. | species       | total mass |  | total length | standard length |  |  |  |  |  |
|----------|---------------|------------|--|--------------|-----------------|--|--|--|--|--|
| 1.       | Illyrian chub | 138,7      |  | 24,0         | 20,0            |  |  |  |  |  |
| 2.       | Illyrian chub | 65,0       |  | 19,0         | 15,5            |  |  |  |  |  |
| 3.       | Illyrian chub | 50,7       |  | 17,5         | 14,0            |  |  |  |  |  |
| 4.       | Illyrian chub | 79,1       |  | 19,0         | 15,5            |  |  |  |  |  |
| 5.       | Illyrian chub | 45,5       |  | 16,5         | 14,0            |  |  |  |  |  |
| 7.       | Illyrian chub | 25,0       |  | 14,5         | 12,0            |  |  |  |  |  |
| 8.       | Illyrian chub | 103,0      |  | 21,0         | 17,5            |  |  |  |  |  |
| 9.       | Illyrian chub | 70,1       |  | 18,0         | 15,0            |  |  |  |  |  |
| 10.      | Illyrian chub | 43,5       |  | 16,0         | 13,5            |  |  |  |  |  |
| 11.      | Illyrian chub | 22,0       |  | 14,0         | 11,5            |  |  |  |  |  |
| 12.      | Illyrian chub | 34,0       |  | 15,5         | 13,0            |  |  |  |  |  |
| 13.      | Illyrian chub | 19,0       |  | 12,5         | 10,0            |  |  |  |  |  |
| 14.      | Illyrian chub | 24,0       |  | 13,5         | 11,0            |  |  |  |  |  |
| 15.      | Illyrian chub | 24,0       |  | 13,5         | 11,0            |  |  |  |  |  |
| 16.      | Illyrian chub | 5,0        |  | 8,5          | 7,0             |  |  |  |  |  |
| 17.      | Illyrian chub | 9,0        |  | 10,5         | 8,5             |  |  |  |  |  |

|     |               |      |  |      |      |  |  |  |  |  |
|-----|---------------|------|--|------|------|--|--|--|--|--|
| 18. | Illyrian chub | 7,0  |  | 9,0  | 7,5  |  |  |  |  |  |
| 19. | Illyrian chub | 5,0  |  | 8,5  | 7,0  |  |  |  |  |  |
| 20. | Illyrian chub | 19,0 |  | 13,5 | 11,5 |  |  |  |  |  |
| 21. | Illyrian chub | 45,0 |  | 15,5 | 13,0 |  |  |  |  |  |
| 22. | Illyrian chub | 72,0 |  | 20,0 | 16,5 |  |  |  |  |  |
| 23. | Illyrian chub | 20,0 |  | 12,5 | 10,5 |  |  |  |  |  |
| 24. | Illyrian chub | 18,0 |  | 13,0 | 11,0 |  |  |  |  |  |
| 25. | Illyrian chub | 9,0  |  | 11,0 | 9,0  |  |  |  |  |  |
| 26. | Illyrian chub | 7,0  |  | 9,2  | 7,5  |  |  |  |  |  |
| 27. | Illyrian chub | 5,0  |  | 8,0  | 6,5  |  |  |  |  |  |

**KRKA – X FIELD TRIP (NOVEMBER. 2007) LOCATION 4. (Manastir Krka)**

| fish no. | species      | total mass |  | total length | standard length |  |  |  |  |  |
|----------|--------------|------------|--|--------------|-----------------|--|--|--|--|--|
| 3.       | Zrmanja chub | 1,3        |  | 5,8          | 4,5             |  |  |  |  |  |
| 4.       | Zrmanja chub | /          |  | 4,3          | 3,5             |  |  |  |  |  |
| 5.       | Zrmanja chub | /          |  | 4,0          | 3,3             |  |  |  |  |  |
| 6.       | Zrmanja chub | /          |  | 4,1          | 3,5             |  |  |  |  |  |

**KRKA - X FIELD TRIP (NOVEMBER. 2007) LOCATION 8. (Skradinski Buk)**

| fish no. | species      | total mass |  | total length | standard length |  |  |  |  |  |
|----------|--------------|------------|--|--------------|-----------------|--|--|--|--|--|
| 2.       | Zrmanja chub | 5,2        |  | 8,5          | 7,0             |  |  |  |  |  |
| 3.       | Zrmanja chub | 3,7        |  | 8,0          | 6,5             |  |  |  |  |  |

|     |               |      |  |      |      |  |  |  |  |  |
|-----|---------------|------|--|------|------|--|--|--|--|--|
| 4.  | Zrmanja chub  | 4,5  |  | 8,1  | 6,5  |  |  |  |  |  |
| 5.  | Zrmanja chub  | 10,2 |  | 11,0 | 9,0  |  |  |  |  |  |
| 6.  | Zrmanja chub  | 14,8 |  | 12,3 | 10,0 |  |  |  |  |  |
| 7.  | Zrmanja chub  | 12,8 |  | 11,1 | 9,0  |  |  |  |  |  |
| 8.  | Illyrian chub | 2,1  |  | 6,5  | 5,2  |  |  |  |  |  |
| 9.  | Illyrian chub | 6,0  |  | 9,0  | 7,5  |  |  |  |  |  |
| 10. | Illyrian chub | 3,5  |  | 7,3  | 6,0  |  |  |  |  |  |
| 11. | Illyrian chub | 6,4  |  | 9,2  | 7,5  |  |  |  |  |  |
| 12. | Illyrian chub | 4,5  |  | 8,2  | 7,0  |  |  |  |  |  |
| 13. | Illyrian chub | 12,6 |  | 11,5 | 9,5  |  |  |  |  |  |
| 14. | Illyrian chub | 11,9 |  | 11,0 | 9,0  |  |  |  |  |  |
| 15. | Illyrian chub | 7,2  |  | 9,2  | 8,0  |  |  |  |  |  |
| 16. | Illyrian chub | 4,7  |  | 8,0  | 6,5  |  |  |  |  |  |
| 17. | Illyrian chub | 9,5  |  | 10,0 | 8,0  |  |  |  |  |  |
| 18. | Illyrian chub | 23,3 |  | 13,5 | 11,0 |  |  |  |  |  |
| 20. | Zrmanja chub  | 6,0  |  | 9,0  | 7,5  |  |  |  |  |  |
| 21. | Illyrian chub | 30,0 |  | 14,5 | 12,0 |  |  |  |  |  |
| 22. | Illyrian chub | 42,7 |  | 16,0 | 13,0 |  |  |  |  |  |
| 23. | Illyrian chub | 6,4  |  | 9,0  | 7,5  |  |  |  |  |  |
| 24. | Illyrian chub | 6,2  |  | 9,5  | 7,7  |  |  |  |  |  |
| 25. | Illyrian chub | 12,0 |  | 11,0 | 9,5  |  |  |  |  |  |

|     |               |      |  |      |      |  |  |  |  |  |
|-----|---------------|------|--|------|------|--|--|--|--|--|
| 26. | Illyrian chub | 59,7 |  | 17,7 | 14,5 |  |  |  |  |  |
| 27. | Illyrian chub | 7,5  |  | 10,0 | 8,0  |  |  |  |  |  |
| 28. | Zrmanja chub  | 64,6 |  | 20,0 | 16,5 |  |  |  |  |  |
| 29. | Illyrian chub | 66,6 |  | 18,2 | 15,0 |  |  |  |  |  |
| 30. | Illyrian chub | 41,3 |  | 16,0 | 13,5 |  |  |  |  |  |
| 31. | Illyrian chub | 46,1 |  | 16,5 | 13,5 |  |  |  |  |  |
| 32. | Zrmanja chub  | 43,5 |  | 17,2 | 14,5 |  |  |  |  |  |
| 33. | Illyrian chub | 56,7 |  | 18,5 | 15,0 |  |  |  |  |  |
| 34. | Zrmanja chub  | 43,2 |  | 17,0 | 14,0 |  |  |  |  |  |
| 36. | Zrmanja chub  | 31,8 |  | 14,9 | 12,5 |  |  |  |  |  |
| 37. | Zrmanja chub  | 21,5 |  | 13,2 | 11,1 |  |  |  |  |  |
| 38. | Zrmanja chub  | 21,7 |  | 13,9 | 11,9 |  |  |  |  |  |

| KRKA – XI FIELD TRIP (APRIL 2008) LOCATION 4. (Manastir Krka) |               |            |  |              |                 |  |  |  |  |  |
|---------------------------------------------------------------|---------------|------------|--|--------------|-----------------|--|--|--|--|--|
| fish no.                                                      | species       | total mass |  | total length | standard length |  |  |  |  |  |
| 2.                                                            | Illyrian chub | 75,6       |  | 19,5         | 16,0            |  |  |  |  |  |
| 3.                                                            | Illyrian chub | 124,7      |  | 22,0         | 18,5            |  |  |  |  |  |
| 4.                                                            | Illyrian chub | 44,9       |  | 16,8         | 14,0            |  |  |  |  |  |
| 5.                                                            | Illyrian chub | 102,5      |  | 21,2         | 17,5            |  |  |  |  |  |
| 6.                                                            | Illyrian chub | 79,2       |  | 19,5         | 16,0            |  |  |  |  |  |
| 7.                                                            | Illyrian chub | 109,3      |  | 22,0         | 18,0            |  |  |  |  |  |

|     |               |      |  |      |      |  |  |  |  |  |
|-----|---------------|------|--|------|------|--|--|--|--|--|
| 8.  | Illyrian chub | 76,6 |  | 19,8 | 16,5 |  |  |  |  |  |
| 9.  | Illyrian chub | 49,0 |  | 17,0 | 14,0 |  |  |  |  |  |
| 10. | Illyrian chub | 93,7 |  | 20,5 | 17,0 |  |  |  |  |  |
| 11. | Illyrian chub | 80,8 |  | 20,0 | 16,5 |  |  |  |  |  |
| 12. | Illyrian chub | 65,0 |  | 19,0 | 16,5 |  |  |  |  |  |
| 13. | Illyrian chub | 26,8 |  | 13,5 | 11,5 |  |  |  |  |  |
| 14. | Illyrian chub | 82,7 |  | 20,5 | 17,0 |  |  |  |  |  |
| 15. | Illyrian chub | 41,1 |  | 16,0 | 13,5 |  |  |  |  |  |
| 16. | Illyrian chub | 42,2 |  | 16,5 | 14,0 |  |  |  |  |  |

| KRKA - XI FIELD TRIP (APRIL 2008) LOCATION 5. (Roški slap) |               |            |  |              |                 |  |  |  |  |  |
|------------------------------------------------------------|---------------|------------|--|--------------|-----------------|--|--|--|--|--|
| fish no.                                                   | species       | total mass |  | total length | standard length |  |  |  |  |  |
| 1.                                                         | Illyrian chub | 77,3       |  | 20,5         | 17,0            |  |  |  |  |  |
| 2.                                                         | Illyrian chub | 77,9       |  | 20,0         | 16,5            |  |  |  |  |  |
| 3.                                                         | Illyrian chub | 35,5       |  | 16,0         | 13,5            |  |  |  |  |  |
| 4.                                                         | Illyrian chub | 117,0      |  | 22,0         | 19,0            |  |  |  |  |  |
| 5.                                                         | Illyrian chub | 105,5      |  | 21,5         | 18,0            |  |  |  |  |  |
| 11.                                                        | Illyrian chub | 3,0        |  | 7,1          | 5,9             |  |  |  |  |  |
| 12.                                                        | Illyrian chub | 3,2        |  | 7,5          | 6,3             |  |  |  |  |  |

| KRKA - XI FIELD TRIP (APRIL 2008) LOCATION 8. (Skradinski Buk). |         |       |  |       |          |  |  |  |  |  |
|-----------------------------------------------------------------|---------|-------|--|-------|----------|--|--|--|--|--|
| fish                                                            | species | total |  | total | standard |  |  |  |  |  |

| no. |              | mass |  | length | length |  |  |  |  |  |
|-----|--------------|------|--|--------|--------|--|--|--|--|--|
| 1.  | Zrmanja chub | 34,2 |  | 16,0   | 13,2   |  |  |  |  |  |
| 2.  | Zrmanja chub | 35,8 |  | 16,0   | 13,2   |  |  |  |  |  |
| 3.  | Zrmanja chub | 43,7 |  | 16,7   | 13,7   |  |  |  |  |  |
| 4.  | Zrmanja chub | 63,3 |  | 18,2   | 15,0   |  |  |  |  |  |
